# Supplementary material
Source: publisher figshare collection journal article supplement (https://tandf.figshare.com/articles/dataset/_/12513224)
Supplement: Supplementary file 1 [file 1]

|                 | Selection bias Random sequence generation | Selection bias Allocation concealment | Performance bias Blinding (participants and personnel) | Detection bias Blinding (outcome assessment) | Blinding of outcome assessment | Attrition bias Incomplete outcome data | Reporting bias Selective reporting | Other bias Other sources of bias |
|-----------------|-------------------------------------------|---------------------------------------|--------------------------------------------------------|----------------------------------------------|--------------------------------|----------------------------------------|------------------------------------|----------------------------------|
| Reich 2016      | +                                         | +                                     | +                                                      | +                                            | +                              | +                                      | +                                  | +                                |
| Rich 2015       | ?                                         | ?                                     | +                                                      | +                                            | +                              | +                                      | +                                  | -                                |
| Thaçi 2015      | +                                         | +                                     | +                                                      | +                                            | +                              | -                                      | +                                  | -                                |
| Langley 2018    | +                                         | +                                     | +                                                      | +                                            | +                              | +                                      | +                                  | -                                |
| Bagel 2011      | +                                         | +                                     | +                                                      | +                                            | +                              | +                                      | +                                  | +                                |
| Stein Gold 2018 | +                                         | -                                     | -                                                      | -                                            | +                              | +                                      | +                                  | +                                |
| Papp 2012       | +                                         | +                                     | ?                                                      | +                                            | +                              | -                                      | +                                  | +                                |
| Reich 2017      | +                                         | +                                     | +                                                      | +                                            | +                              | ?                                      | +                                  | +                                |
| Reich 2016      | +                                         | +                                     | +                                                      | +                                            | +                              | +                                      | +                                  | +                                |
| Langley 2015    | +                                         | +                                     | +                                                      | +                                            | +                              | -                                      | +                                  | +                                |
| Papp 2016       | +                                         | +                                     | +                                                      | +                                            | +                              | +                                      | +                                  | +                                |
| Nakagawa 2015   | +                                         | +                                     | +                                                      | +                                            | +                              | +                                      | +                                  | +                                |
| Foley 2018      | +                                         | +                                     | +                                                      | +                                            | +                              | +                                      | +                                  | +                                |
| Bagel 2017      | +                                         | +                                     | +                                                      | +                                            | +                              | +                                      | +                                  | +                                |
