# Supplementary material
Source: publisher figshare collection journal article supplement (https://tandf.figshare.com/articles/dataset/_/12513224)
Supplement: Supplementary file 2 [file 1]

| #  | Search strategy                                                                                                                                                               | # of results |
|----|-------------------------------------------------------------------------------------------------------------------------------------------------------------------------------|--------------|
| 1  | ("adalimumab"[MeSH Terms] OR "adalimumab"[All Fields]) AND ("psoriasis"[MeSH Terms] OR "psoriasis"[All Fields])                                                               | 1654         |
| 2  | ("adalimumab"[MeSH Terms] OR "adalimumab"[All Fields]) AND ("scalp"[MeSH Terms] OR "scalp"[All Fields]) AND ("psoriasis"[MeSH Terms] OR "psoriasis"[All Fields])              | 41           |
| 3  | ("etanercept"[MeSH Terms] OR "etanercept"[All Fields]) AND ("psoriasis"[MeSH Terms] OR "psoriasis"[All Fields])                                                               | 2078         |
| 4  | ("etanercept"[MeSH Terms] OR "etanercept"[All Fields]) AND ("scalp"[MeSH Terms] OR "scalp"[All Fields]) AND ("psoriasis"[MeSH Terms] OR "psoriasis"[All Fields])              | 22           |
| 5  | ("infliximab"[MeSH Terms] OR "infliximab"[All Fields]) AND ("psoriasis"[MeSH Terms] OR "psoriasis"[All Fields])                                                               | 1778         |
| 6  | ("infliximab"[MeSH Terms] OR "infliximab"[All Fields]) AND ("scalp"[MeSH Terms] OR "scalp"[All Fields]) AND ("psoriasis"[MeSH Terms] OR "psoriasis"[All Fields])              | 31           |
| 7  | ("ustekinumab"[MeSH Terms] OR "ustekinumab"[All Fields]) AND ("psoriasis"[MeSH Terms] OR "psoriasis"[All Fields])                                                             | 1014         |
| 8  | ("ustekinumab"[MeSH Terms] OR "ustekinumab"[All Fields]) AND ("scalp"[MeSH Terms] OR "scalp"[All Fields]) AND ("psoriasis"[MeSH Terms] OR "psoriasis"[All Fields])            | 17           |
| 9  | ("secukinumab"[Supplementary Concept] OR "secukinumab"[All Fields]) AND ("psoriasis"[MeSH Terms] OR "psoriasis"[All Fields])                                                  | 381          |
| 10 | ("secukinumab"[Supplementary Concept] OR "secukinumab"[All Fields]) AND ("scalp"[MeSH Terms] OR "scalp"[All Fields]) AND ("psoriasis"[MeSH Terms] OR "psoriasis"[All Fields]) | 7            |
| 11 | ("ixekizumab"[Supplementary Concept] OR "ixekizumab"[All Fields]) AND ("psoriasis"[MeSH Terms] OR "psoriasis"[All Fields])                                                    | 233          |
| 12 | ("ixekizumab"[Supplementary Concept] OR "ixekizumab"[All Fields]) AND ("scalp"[MeSH Terms] OR "scalp"[All Fields]) AND ("psoriasis"[MeSH Terms] OR "psoriasis"[All Fields])   | 8            |
| 13 | ("tildrakizumab"[Supplementary Concept] OR "tildrakizumab"[All Fields]) AND ("psoriasis"[MeSH Terms] OR "psoriasis"[All Fields])                                              | 43           |

|    |                                                                                                                                                                                                                                          |      |
|----|------------------------------------------------------------------------------------------------------------------------------------------------------------------------------------------------------------------------------------------|------|
| 14 | ("tildrakizumab"[Supplementary Concept] OR "tildrakizumab"[All Fields]) AND ("scalp"[MeSH Terms] OR "scalp"[All Fields]) AND ("psoriasis"[MeSH Terms] OR "psoriasis"[All Fields])                                                        | 1    |
| 15 | ("guselkumab"[Supplementary Concept] OR "guselkumab"[All Fields]) AND ("psoriasis"[MeSH Terms] OR "psoriasis"[All Fields])                                                                                                               | 72   |
| 16 | ("guselkumab"[Supplementary Concept] OR "guselkumab"[All Fields]) AND ("scalp"[MeSH Terms] OR "scalp"[All Fields]) AND ("psoriasis"[MeSH Terms] OR "psoriasis"[All Fields])                                                              | 4    |
| 17 | ("brodalumab"[Supplementary Concept] OR "brodalumab"[All Fields]) AND ("psoriasis"[MeSH Terms] OR "psoriasis"[All Fields])                                                                                                               | 154  |
| 18 | ("brodalumab"[Supplementary Concept] OR "brodalumab"[All Fields]) AND ("scalp"[MeSH Terms] OR "scalp"[All Fields]) AND ("psoriasis"[MeSH Terms] OR "psoriasis"[All Fields])                                                              | 3    |
| 19 | ("certolizumab pegol"[MeSH Terms] OR ("certolizumab"[All Fields] AND "pegol"[All Fields]) OR "certolizumab pegol"[All Fields]) AND ("psoriasis"[MeSH Terms] OR "psoriasis"[All Fields])                                                  | 118  |
| 20 | ("certolizumab pegol"[MeSH Terms] OR ("certolizumab"[All Fields] AND "pegol"[All Fields]) OR "certolizumab pegol"[All Fields]) AND ("scalp"[MeSH Terms] OR "scalp"[All Fields]) AND ("psoriasis"[MeSH Terms] OR "psoriasis"[All Fields]) | 2    |
| 21 | ("apremilast"[Supplementary Concept] OR "apremilast"[All Fields]) AND ("psoriasis"[MeSH Terms] OR "psoriasis"[All Fields])                                                                                                               | 246  |
| 22 | ("apremilast"[Supplementary Concept] OR "apremilast"[All Fields]) AND ("scalp"[MeSH Terms] OR "scalp"[All Fields]) AND ("psoriasis"[MeSH Terms] OR "psoriasis"[All Fields])                                                              | 13   |
| 23 | ("biology"[MeSH Terms] OR "biology"[All Fields] OR "biologic"[All Fields]) AND ("psoriasis"[MeSH Terms] OR "psoriasis"[All Fields])                                                                                                      | 3059 |
| 24 | ("biology"[MeSH Terms] OR "biology"[All Fields] OR "biologic"[All Fields]) AND ("scalp"[MeSH Terms] OR "scalp"[All Fields]) AND ("psoriasis"[MeSH Terms] OR "psoriasis"[All Fields])                                                     | 37   |
| 25 | ("Small"[Journal] OR "small"[All Fields]) AND ("Molecules"[Journal] OR "molecules"[All Fields]) AND ("psoriasis"[MeSH Terms] OR "psoriasis"[All Fields])                                                                                 | 161  |
| 26 | ("Small"[Journal] OR "small"[All Fields]) AND ("Molecules"[Journal] OR "molecules"[All Fields]) AND ("scalp"[MeSH Terms] OR "scalp"[All Fields]) AND ("psoriasis"[MeSH Terms] OR "psoriasis"[All Fields])                                | 1    |
